# Supplementary material for: Evaluation of Indonesian mangrove Xylocarpus granatum leaves ethyl acetate extract as potential anticancer drug
Source: PubMed Central journal article supplement (PMC7971038; doi:10.1038/s41598-021-85383-3), 2021-03-16
Supplement: 41598_2021_85383_MOESM1_ESM.pdf [file 41598_2021_85383_MOESM1_ESM.pdf]

# Evaluation of Indonesian Mangrove *Xylocarpus granatum* Leaves Ethyl Acetate Extract as Potential Anticancer

Jason Darmadi<sup>a</sup>, Razethy Rahayu Batubara<sup>a</sup>, Sandiego Himawan<sup>a</sup>, Norma Nur Azizah<sup>b</sup>, Hilyatushalihah Kholis Audah<sup>a</sup>, Ade Arsianti<sup>b,c</sup>, Evi Kurniawaty<sup>d</sup>, Intan Safinar Ismail<sup>e</sup>, Irmanida Batubara<sup>f,g</sup>, Kholis Abdurachim Audah<sup>a,h,\*</sup>

- a. Department of Biomedical Engineering, Swiss German University, 15143 Tangerang, Indonesia
  - b. Drug Development Research Center, IMERI, University of Indonesia, 10430 Jakarta, Indonesia
  - c. Department of Medical Chemistry, University of Indonesia, 10430 Jakarta, Indonesia
  - d. Faculty of Medicine, University of Lampung, 35145 Bandar Lampung, Indonesia
  - e. Institute of Bioscience, Universiti Putra Malaysia, 43400 Serdang, Malaysia
  - f. Biopharmaca Tropica Research Center, IPB University, 16680 Bogor, Indonesia
  - g. Department of Chemistry, IPB University, 16680 Bogor, Indonesia
  - h. Directorate of Academic Research and Community Service, Swiss German University, 15143 Tangerang, Indonesia
- \* Corresponding Author: kholis.audah@sgu.ac.id; Tel.: +62-212-9779-596/9-598

## Supplementary Materials:

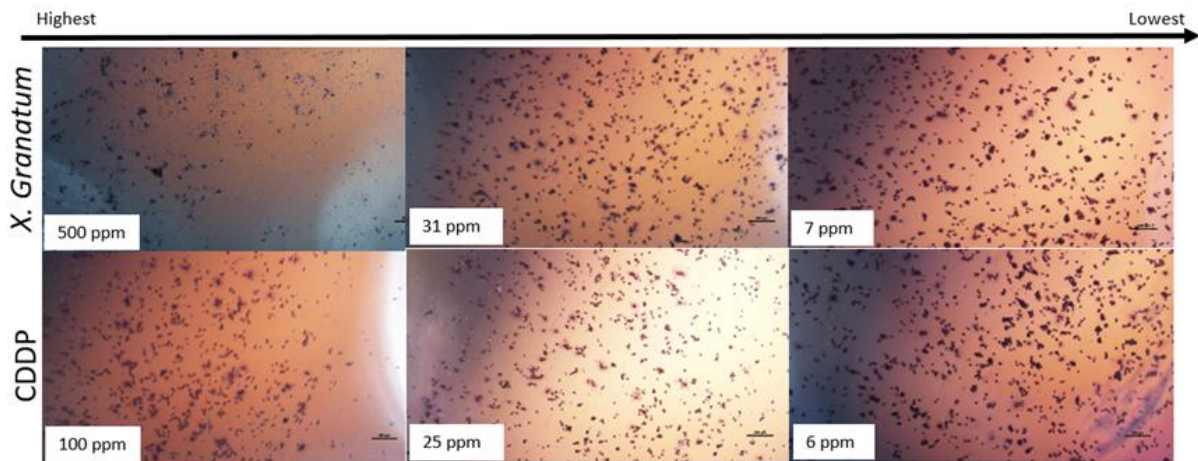

**Figure S1.** Comparison between colorectal cancer HT-29 cell line after being exposed to reference drug Cisplatin (CDDP) and *Xylocarpus granatum* leaves ethyl acetate crude extract at different concentrations.

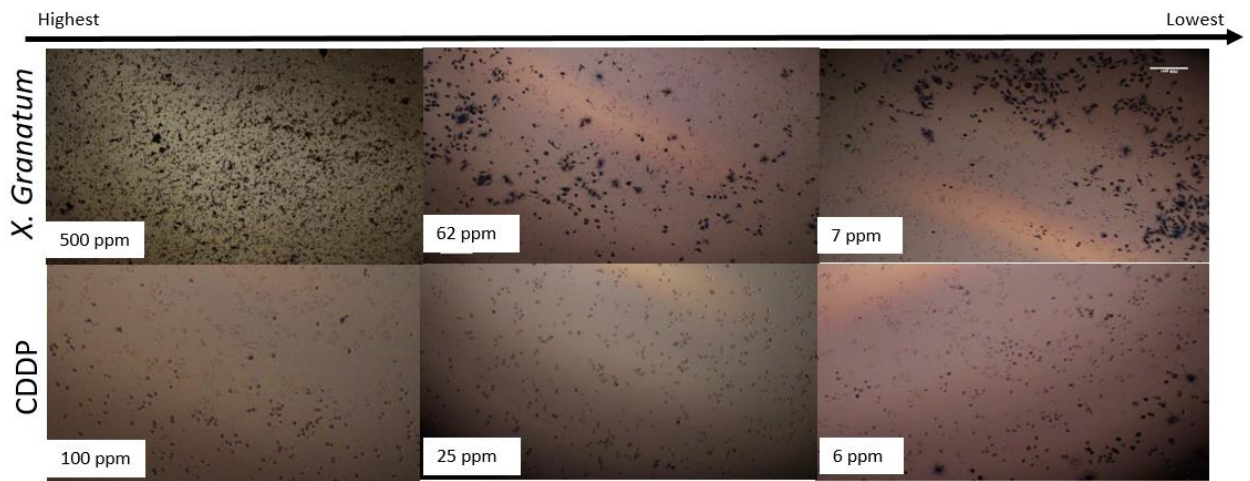

**Figure S2.** Comparison between cervical cancer HeLa cell line after being exposed to reference drug CDDP and *X. granatum* leaves ethyl acetate crude extract at different concentrations.

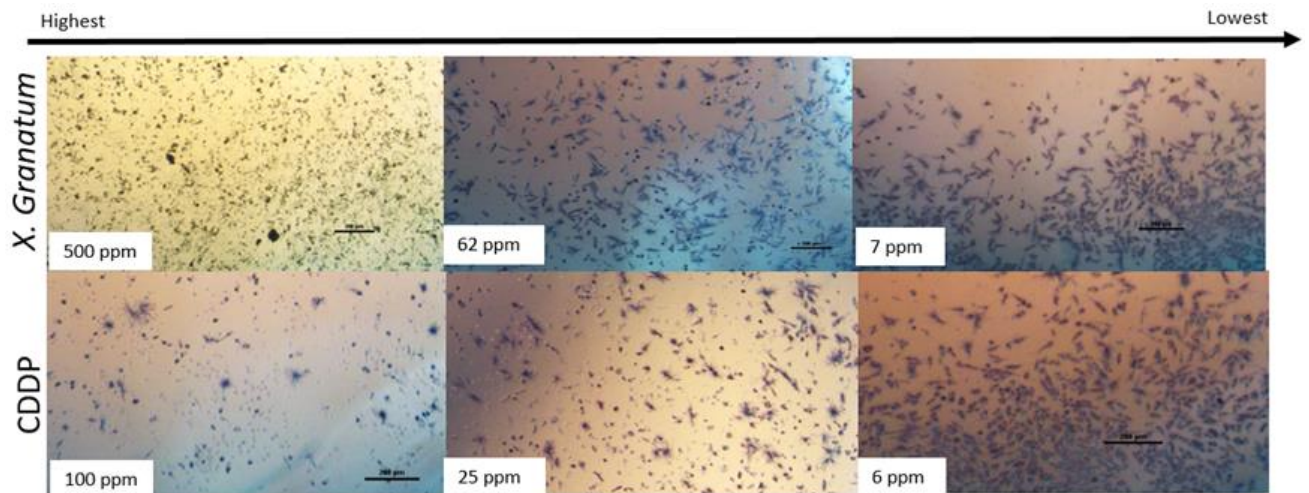

**Figure S3.** Comparison between breast cancer T47D cell line after being exposed to reference drug CDDP and *X. granatum* leaves ethyl acetate crude extract at different concentrations.

**Table S1.** Correlation between antioxidant activity of *X. granatum* leaves ethyl acetate crude extract with its anticancer activity as well as its stem cell enhancement activator effect.

| Concentration (ppm) | Antioxidant Inhibition (%) | Anticancer Inhibition (%) |        |        | Cell Enhancement Activator (%) |
|---------------------|----------------------------|---------------------------|--------|--------|--------------------------------|
|                     |                            | HT-29                     | HeLa   | T47D   |                                |
| 0                   | 42,78                      | -                         | -      | -      | -                              |
| 6,25                | 43,32                      | 18,63                     | -19,88 | 2,72   | 19,32                          |
| 12,5                | 43,86                      | 30,74                     | -8,65  | 13,27  | 32,66                          |
| 25                  | 44,93                      | 42,85                     | 2,58   | 23,82  | 46,01                          |
| 50                  | 47,09                      | 54,96                     | 13,81  | 34,37  | 59,35                          |
| 70,7                | 48,87                      | 61,01                     | 19,42  | 39,64  | 66,02                          |
| 100                 | 51,4                       | 67,06                     | 25,04  | 44,92  | 72,69                          |
| 170                 | 57,43                      | 76,33                     | 33,64  | 53,00  | 82,91                          |
| 200                 | 60,02                      | 79,17                     | 36,27  | 55,47  | 86,03                          |
| 250                 | 64,33                      | 83,07                     | 39,89  | 58,87  | 90,33                          |
| 400                 | 77,26                      | 91,28                     | 47,50  | 66,02  | 99,38                          |
| 500                 | 85,88                      | 95,18                     | 51,12  | 69,42  | 103,67                         |
| 658.6               | 99,55                      | 99,99                     | 55,58  | 73,61  | 108,97                         |
| 800                 | 111,74                     | 103,39                    | 58,73  | 76,57  | 112,72                         |
| 1000                | 128,98                     | 107,29                    | 62,35  | 79,97  | 117,01                         |
| 1600                | 180,7                      | 115,50                    | 69,96  | 87,12  | 126,06                         |
| 1800                | 197,94                     | 117,56                    | 71,87  | 88,91  | 128,33                         |
| 2000                | 215,18                     | 119,40                    | 73,58  | 90,52  | 130,36                         |
| 2500                | 258,28                     | 123,30                    | 77,19  | 93,91  | 134,65                         |
| 3000                | 301,38                     | 126,48                    | 80,15  | 96,69  | 138,16                         |
| 4000                | 387,58                     | 131,51                    | 84,81  | 101,07 | 143,70                         |
| 8000                | 732,38                     | 143,62                    | 96,04  | 111,62 | 157,04                         |
| 10000               | 904,78                     | 147,51                    | 99,65  | 115,01 | 161,34                         |

**Table S2.** Results of the Shapiro-Wilk Statistical test of normality for comparative analysis of *X. granatum* Leaves Water extract, Ethanol extract, Ethyl Acetate Extract and Doxorubicin drug control with their anticancer activity.

|              | Extract Type  | Shapiro-Wilk |    |      |
|--------------|---------------|--------------|----|------|
|              |               | Statistic    | df | Sig. |
| <b>MCF-7</b> | Water         | .903         | 3  | .396 |
|              | Ethanol       | .939         | 3  | .525 |
|              | Ethyl Acetate | .978         | 3  | .715 |
|              | Dox           | .937         | 3  | .514 |
| <b>HeLa</b>  | Water         | .903         | 3  | .396 |
|              | Ethanol       | .913         | 3  | .427 |
|              | Ethyl Acetate | .750         | 3  | .000 |
|              | Dox           | .994         | 3  | .849 |

**Table S3.** Results of the Levene's test of Homogeneity of variances for the comparative analysis of *X. granatum* Leaves Water extract, Ethanol extract, Ethyl Acetate Extract and Doxorubicin drug control with their anticancer activity.

|              |                                         | Levene<br>Statistic | df1 | df2   | Sig. |
|--------------|-----------------------------------------|---------------------|-----|-------|------|
| <b>MCF-7</b> | Based on Mean                           | 7.977               | 3   | 8     | .009 |
|              | Based on Median                         | 1.446               | 3   | 8     | .300 |
|              | Based on Median and<br>with adjusted df | 1.446               | 3   | 2.303 | .416 |
|              | Based on trimmed mean                   | 7.114               | 3   | 8     | .012 |
| <b>HeLa</b>  | Based on Mean                           | 9.279               | 3   | 8     | .006 |
|              | Based on Median                         | 1.657               | 3   | 8     | .252 |
|              | Based on Median and<br>with adjusted df | 1.657               | 3   | 2.230 | .383 |
|              | Based on trimmed mean                   | 8.257               | 3   | 8     | .008 |

**Table S4.** Results of the Oneway ANOVA F test for the comparative analysis of *X. granatum* Leaves Water extract, Ethanol extract, Ethyl Acetate Extract and Doxorubicin drug control with their anticancer activity.

|              |                   | ANOVA             |    |                |        |      |
|--------------|-------------------|-------------------|----|----------------|--------|------|
|              |                   | Sum of<br>Squares | df | Mean<br>Square | F      | Sig. |
| <b>MCF-7</b> | Between<br>Groups | 5336.422          | 3  | 1778.807       | 71.884 | .000 |
|              | Within Groups     | 197.965           | 8  | 24.746         |        |      |
|              | Total             | 5534.387          | 11 |                |        |      |
| <b>HeLa</b>  | Between<br>Groups | 1757.331          | 3  | 585.777        | 12.571 | .002 |
|              | Within Groups     | 372.778           | 8  | 46.597         |        |      |
|              | Total             | 2130.109          | 11 |                |        |      |

**Table S5.** Results of the Brown-Forsythe F test for the comparative analysis of *X. granatum* Leaves Water extract, Ethanol extract, Ethyl Acetate Extract and Doxorubicin drug control with their anticancer activity.

| <b>Robust Tests of Equality of Means</b> |                |                              |            |            |             |
|------------------------------------------|----------------|------------------------------|------------|------------|-------------|
|                                          |                | <b>Statistic<sup>a</sup></b> | <b>df1</b> | <b>df2</b> | <b>Sig.</b> |
| <b>MCF-7</b>                             | Brown-Forsythe | 71.884                       | 3          | 2.363      | .007        |
| <b>HeLa</b>                              | Brown-Forsythe | 12.571                       | 3          | 2.242      | .060        |

a. Asymptotically F distributed.

**Table S6.** Results of the Games-Howell Post-hoc analysis for the comparative analysis with multiple comparisons of *X. granatum* Leaves Water extract, Ethanol extract, Ethyl Acetate Extract and Doxorubicin drug control with their anticancer activity.

| <b>Multiple Comparisons</b> |                     |                         |                         |                              |                   |             |                                |                    |
|-----------------------------|---------------------|-------------------------|-------------------------|------------------------------|-------------------|-------------|--------------------------------|--------------------|
| <b>Dependent Variable</b>   |                     | <b>(I) Extract Type</b> | <b>(J) Extract Type</b> | <b>Mean Difference (I-J)</b> | <b>Std. Error</b> | <b>Sig.</b> | <b>95% Confidence Interval</b> |                    |
|                             |                     |                         |                         |                              |                   |             | <b>Lower Bound</b>             | <b>Upper Bound</b> |
| <b>MCF-7</b>                | <b>Games-Howell</b> | Water                   | Ethanol                 | -                            | 5.707             | .06         | -                              | 3.24806            |
|                             |                     |                         |                         | 30.906666                    | 6654              | 2           | 65.0613                        | 5                  |
|                             |                     |                         |                         | 7                            | 99                |             |                                |                    |
|                             |                     |                         | Ethyl Acetate           | -                            | 5.508             | .02         | -                              | -                  |
|                             |                     |                         |                         | 52.823333                    | 7224              | 6           | 90.7499                        | 14.8967            |
|                             |                     |                         |                         | 3*                           |                   |             | 09                             | 58                 |
|                             |                     | Dox                     | -                       | 5.531                        | .02               | -           | -                              |                    |
|                             |                     |                         | 50.126666               | 0256                         | 8                 | 87.5369     | 12.7163                        |                    |
|                             |                     |                         | 7*                      |                              |                   | 90          | 44                             |                    |
|                             |                     | Ethanol                 | Water                   | 30.906666                    | 5.707             | .06         | -                              | 65.0613            |
|                             |                     |                         |                         | 7                            | 6654              | 2           | 3.24806                        | 99                 |
|                             |                     |                         |                         | 5                            |                   |             |                                |                    |
| Ethyl Acetate               | -                   |                         | 1.549                   | .01                          | -                 | -           |                                |                    |
|                             | 21.916666           |                         | 7885                    | 0                            | 31.8642           | 11.9690     |                                |                    |
|                             | 7*                  |                         |                         |                              | 91                | 42          |                                |                    |
| Dox                         | -                   | 1.627                   | .00                     | -                            | -                 |             |                                |                    |
|                             | 19.220000           | 2881                    | 8                       | 28.0828                      | 10.3571           |             |                                |                    |
|                             | 0*                  |                         |                         | 76                           | 24                |             |                                |                    |
| Ethyl Acetate               | Water               | 52.823333               | 5.508                   | .02                          | 14.8967           | 90.7499     |                                |                    |
|                             |                     | 3*                      | 7224                    | 6                            | 58                | 09          |                                |                    |
|                             |                     | 21.916666               | 1.549                   | .01                          | 11.9690           | 31.8642     |                                |                    |
| 7*                          | 7885                | 0                       | 42                      | 91                           |                   |             |                                |                    |



---

|         |          |       |     |         |         |
|---------|----------|-------|-----|---------|---------|
| Ethyl   | 2.793333 | .2838 | .01 | 1.06107 | 4.52559 |
| Acetate | *        | 623   | 8   | 5       | 2       |

---

\*. The mean difference is significant at the 0.05 level.

**Table S7.** Results of the Shapiro-Wilk Statistical test of normality for *X. granatum* and CDDP IC50 samples across cell types.

|                         | Cell-type | Shapiro-Wilk |    |      |
|-------------------------|-----------|--------------|----|------|
|                         |           | Statistic    | df | Sig. |
| <b>IC50_X. granatum</b> | hADSC     | .802         | 3  | .119 |
|                         | HeLA      | .809         | 3  | .136 |
|                         | T47D      | .872         | 3  | .302 |
|                         | HT-29     | .902         | 3  | .392 |
| <b>IC50_CDDP</b>        | hADSC     | .840         | 3  | .215 |
|                         | HeLA      | .750         | 3  | .001 |
|                         | T47D      | .954         | 3  | .587 |
|                         | HT-29     | .999         | 3  | .927 |

**Table S8.** Results of the Levene's test of homogeneity for *X. granatum* and CDDP IC50 samples with their cytotoxic activity.

|                         |                                         | Levene    | df1 | df2   | Sig. |
|-------------------------|-----------------------------------------|-----------|-----|-------|------|
|                         |                                         | Statistic |     |       |      |
| <b>IC50_X. granatum</b> | Based on Mean                           | 13.971    | 3   | 8     | .002 |
|                         | Based on Median                         | 1.168     | 3   | 8     | .380 |
|                         | Based on Median and<br>with adjusted df | 1.168     | 3   | 2.025 | .491 |
|                         | Based on trimmed mean                   | 11.410    | 3   | 8     | .003 |
| <b>IC50_CDDP</b>        | Based on Mean                           | 15.658    | 3   | 8     | .001 |
|                         | Based on Median                         | .977      | 3   | 8     | .450 |
|                         | Based on Median and<br>with adjusted df | .977      | 3   | 2.001 | .542 |
|                         | Based on trimmed mean                   | 12.337    | 3   | 8     | .002 |



**Table S9.** Results of the Oneway ANOVA F test used to observe the differences between *X. granatum* and CDDP IC50 samples with their cytotoxic activity.

|                         |                | ANOVA          |    |             |       |      |
|-------------------------|----------------|----------------|----|-------------|-------|------|
|                         |                | Sum of Squares | df | Mean Square | F     | Sig. |
| <b>IC50_X. granatum</b> | Between Groups | 607577.460     | 3  | 202525.820  | 1.092 | .406 |
|                         | Within Groups  | 1483217.592    | 8  | 185402.199  |       |      |
|                         | Total          | 2090795.052    | 11 |             |       |      |
| <b>IC50_CDDP</b>        | Between Groups | 2893781.236    | 3  | 964593.745  | .931  | .469 |
|                         | Within Groups  | 8290515.784    | 8  | 1036314.473 |       |      |
|                         | Total          | 11184297.020   | 11 |             |       |      |

**Table S10.** Results of the Brown-Forsythe F test used to observe the differences between *X. granatum* and CDDP IC50 samples with their cytotoxic activity.

|                         |                | Robust Tests of Equality of Means |     |       |      |
|-------------------------|----------------|-----------------------------------|-----|-------|------|
|                         |                | Statistic <sup>a</sup>            | df1 | df2   | Sig. |
| <b>IC50_X. granatum</b> | Brown-Forsythe | 1.092                             | 3   | 2.032 | .509 |
| <b>IC50_CDDP</b>        | Brown-Forsythe | .931                              | 3   | 2.003 | .555 |

a. Asymptotically F distributed.
